# Supplementary material for: Risk factors for hydrocephalus following fourth ventricle tumor surgery: A retrospective analysis of 121 patients
Source: PubMed Central journal article supplement (PMC7671531; doi:10.1371/journal.pone.0241853), 2020-11-17
Supplement: pone.0241853.s001.pdf [file pone.0241853.s001.pdf]

| <b>Variables</b>                                 | <b>Value</b> |
|--------------------------------------------------|--------------|
| <b>Sex</b>                                       |              |
| Female                                           | 61 (50.4%)   |
| Male                                             | 60 (49.6%)   |
| <b>Tumor size (mm)</b>                           | 37 (30-44)   |
| <b>Age (years)</b>                               | 24 (9-41)    |
| <3                                               | 11 (9.1%)    |
| 3-5                                              | 10 (8.3%)    |
| 5-18                                             | 35 (28.9%)   |
| >18                                              | 65 (53.7%)   |
| <b>Tumor pathology</b>                           |              |
| Ependymoma                                       | 37 (30.6%)   |
| Medulloblastoma                                  | 29 (24.0%)   |
| Astrocytoma                                      | 20 (16.5%)   |
| Hemangioblastoma                                 | 7 (5.8%)     |
| Cholesteatoma                                    | 7 (5.8%)     |
| Choroid plexus papilloma                         | 7 (5.8%)     |
| Metastatic                                       | 4 (3.3%)     |
| Non-Hodgkin lymphoma                             | 1 (0.8%)     |
| Other                                            | 9 (7.5%)     |
| <b>Tumor growth characteristics <sup>a</sup></b> |              |
| Lateral extension                                | 34 (28.1%)   |
| Anterior extension                               | 98 (81.0%)   |
| Caudal extension                                 | 69 (57.0%)   |
| Superior extension                               | 14 (11.6%)   |
| No extension beyond the fourth ventricle         | 8 (6.6%)     |

Values are number of patients (%) or median (interquartile range).

<sup>a</sup> Percentages do not add up to 100 because some patients had more than 1 growth characteristic.
