# Supplementary material for: Risk factors for hydrocephalus following fourth ventricle tumor surgery: A retrospective analysis of 121 patients
Source: PubMed Central journal article supplement (PMC7671531; doi:10.1371/journal.pone.0241853), 2020-11-17
Supplement: pone.0241853.s002.pdf [file pone.0241853.s002.pdf]

| Variables                  | Postoperative CSF diversion |            | P-value              |
|----------------------------|-----------------------------|------------|----------------------|
|                            | Yes (15)                    | No (106)   |                      |
| Sex                        |                             |            | 0.012 <sup>a</sup>   |
| Female                     | 3 (4.9%)                    | 51 (95.1%) |                      |
| Male                       | 12 (20%)                    | 48 (80%)   |                      |
| Tumor size (mm)            | 40 (34-49)                  | 36 (30-43) | 0.100                |
| Age (years)                | 18 (3-38)                   | 24 (9-41)  | 0.301                |
| Tumor pathology            |                             |            |                      |
| Ependymoma                 | 3 (8.1%)                    | 34 (91.9%) | 0.226 <sup>b c</sup> |
| Medulloblastoma            | 5 (17.2%)                   | 24 (82.8%) | 1.0 <sup>b c</sup>   |
| Astrocytoma                | 4 (20.0%)                   | 16 (80.0%) |                      |
| Lateral extension          |                             |            | 0.553 <sup>b</sup>   |
| Yes                        | 3 (8.8%)                    | 31 (91.2%) |                      |
| No                         | 12 (13.8%)                  | 75 (86.2%) |                      |
| Anterior extension         |                             |            | 0.159 <sup>b</sup>   |
| Yes                        | 88 (89.8%)                  | 10 (10.2%) |                      |
| No                         | 5 (21.7%)                   | 18 (78.3%) |                      |
| Caudal extension           |                             |            | 0.420 <sup>a</sup>   |
| Yes                        | 10 (14.5%)                  | 59 (85.5%) |                      |
| No                         | 5 (9.6%)                    | 47 (90.4%) |                      |
| Superior extension         |                             |            | 0.015 <sup>b</sup>   |
| Yes                        | 5 (35.7%)                   | 9 (64.3%)  |                      |
| No                         | 10 (9.3%)                   | 97 (90.7%) |                      |
| Extent of resection        |                             |            | <0.001 <sup>b</sup>  |
| GTR                        | 3 (3.3%)                    | 87(96.7%)  |                      |
| STR                        | 12 (38.7%)                  | 19(61.3%)  |                      |
| Preoperative hydrocephalus |                             |            | <0.001 <sup>a</sup>  |
| Yes                        | 15 (21.4%)                  | 55 (78.6%) |                      |
| No                         | 0 (0%)                      | 51 (100%)  |                      |
| Prophylactic EVD           |                             |            | 0.091 <sup>a</sup>   |
| Yes                        | 10 (17.9%)                  | 46 (82.1%) |                      |
| No                         | 5 (7.7%)                    | 60 (92.3%) |                      |

CSF, cerebrospinal fluid; GTR, gross total resection; STR, subtotal resection; EVD, external ventricular drainage.

<sup>a</sup> Chi-square test.

<sup>b</sup> Fisher exact test.

<sup>c</sup> p value compared with astrocytoma
