# Supplementary material for: Risk factors for hydrocephalus following fourth ventricle tumor surgery: A retrospective analysis of 121 patients
Source: PubMed Central journal article supplement (PMC7671531; doi:10.1371/journal.pone.0241853), 2020-11-17
Supplement: pone.0241853.s003.pdf [file pone.0241853.s003.pdf]

| Variables                  | Postoperative VP |             | P-value              |
|----------------------------|------------------|-------------|----------------------|
|                            | Yes (10)         | No (110)    |                      |
| Sex                        |                  |             | 0.054 <sup>b</sup>   |
| Female                     | 2 (3.3%)         | 59 (96.7%)  |                      |
| Male                       | 8 (13.3%)        | 52 (86.7%)  |                      |
| Tumor size (mm)            | 44 (33-53)       | 36 (30-43)  | 0.032                |
| Age (years)                | 16 (1-45)        | 24 (9-41)   | 0.533                |
| Tumor pathology            |                  |             |                      |
| Ependymoma                 | 2 (5.4%)         | 35 (94.6%)  | 0.170 <sup>b c</sup> |
| Medulloblastoma            | 3 (10.3%)        | 26 (89.7%)  | 0.422 <sup>b c</sup> |
| Astrocytoma                | 4 (20.0%)        | 16 (80.0%)  |                      |
| Lateral extension          |                  |             | 0.724 <sup>b</sup>   |
| Yes                        | 2 (5.9%)         | 32 (94.1%)  |                      |
| No                         | 8 (9.2%)         | 79 (90.8%)  |                      |
| Anterior extension         |                  |             | 0.339 <sup>b</sup>   |
| Yes                        | 7 (7.1%)         | 91 (92.9%)  |                      |
| No                         | 3 (13%)          | 20 (87%)    |                      |
| Caudal extension           |                  |             | 1.000 <sup>b</sup>   |
| Yes                        | 6 (8.7%)         | 63 (91.3%)  |                      |
| No                         | 4 (7.7%)         | 48 (92.3%)  |                      |
| Superior extension         |                  |             | 0.016 <sup>b</sup>   |
| Yes                        | 4 (28.6%)        | 10 (71.4%)  |                      |
| No                         | 6 (5.6%)         | 101 (94.4%) |                      |
| Extent of resection        |                  |             | <0.001 <sup>b</sup>  |
| GTR                        | 1 (1.1%)         | 89(98.9%)   |                      |
| STR                        | 9 (29%)          | 22(71%)     |                      |
| Preoperative hydrocephalus |                  |             | <0.005 <sup>b</sup>  |
| Yes                        | 10 (14.3%)       | 60 (85.7%)  |                      |
| No                         | 0 (0%)           | 51 (100%)   |                      |
| Prophylactic EVD           |                  |             | 0.006 <sup>b</sup>   |
| Yes                        | 9 (16.1%)        | 47 (83.9%)  |                      |
| No                         | 1 (1.5%)         | 64 (98.5%)  |                      |

<sup>a</sup> Chi-square test.

<sup>b</sup> Fisher exact test.

<sup>c</sup> p value compared with astrocytoma
