# Supplementary material for: Risk factors for hydrocephalus following fourth ventricle tumor surgery: A retrospective analysis of 121 patients
Source: PubMed Central journal article supplement (PMC7671531; doi:10.1371/journal.pone.0241853), 2020-11-17
Supplement: pone.0241853.s005.pdf [file pone.0241853.s005.pdf]

| Variables           | Postoperative CSF diversion |             | p-value              |
|---------------------|-----------------------------|-------------|----------------------|
|                     | Yes (10)                    | No (46)     |                      |
| Sex                 |                             |             | 0.162 <sup>b</sup>   |
| Female              | 2(8.3%)                     | 22(91.7%)   |                      |
| Male                | 8(25.0%)                    | 24(75.0%)   |                      |
| Tumor size (mm)     | 41(33-50)                   | 36(31-41)   | 0.174                |
| Age (years)         | 22.5(1-45)                  | 25.5(11-41) | 0.528                |
| Tumor pathology     |                             |             |                      |
| Ependymoma          | 3(20.0%)                    | 12(80.0%)   | 0.239 <sup>b c</sup> |
| Medulloblastoma     | 2(15.4%)                    | 11(84.6%)   | 0.357 <sup>b c</sup> |
| Astrocytoma         | 4(36.4%)                    | 7(63.6%)    |                      |
| Lateral extension   |                             |             | 0.713 <sup>b</sup>   |
| Yes                 | 2(13.3%)                    | 13(86.7%)   |                      |
| No                  | 8(19.5%)                    | 33(80.5%)   |                      |
| Anterior extension  |                             |             | 0.361 <sup>b</sup>   |
| Yes                 | 7(15.2%)                    | 39(84.8%)   |                      |
| No                  | 3(30.0%)                    | 7(70.0%)    |                      |
| Caudal extension    |                             |             | 0.727 <sup>b</sup>   |
| Yes                 | 7(20.0%)                    | 28(80.0%)   |                      |
| No                  | 3(14.3%)                    | 18(85.7%)   |                      |
| Superior extension  |                             |             | 0.003 <sup>b</sup>   |
| Yes                 | 5(62.5%)                    | 3(37.5%)    |                      |
| No                  | 5(10.4%)                    | 43(89.6%)   |                      |
| Extent of resection |                             |             | <0.001 <sup>b</sup>  |
| GTR                 | 2(5.0%)                     | 38(95.0%)   |                      |
| STR                 | 8(50.0%)                    | 8(50.0%)    |                      |

<sup>a</sup> Chi-square test.

<sup>b</sup> Fisher exact test.

<sup>c</sup> p value compared with astrocytoma
