# Supplementary material for: Risk factors for hydrocephalus following fourth ventricle tumor surgery: A retrospective analysis of 121 patients
Source: PubMed Central journal article supplement (PMC7671531; doi:10.1371/journal.pone.0241853), 2020-11-17
Supplement: pone.0241853.s006.pdf [file pone.0241853.s006.pdf]

| <b>Variables</b>      | <b>Odds ratio (95% CI)</b> | <b>p-value</b> |
|-----------------------|----------------------------|----------------|
| Superior extension    | 23.400(1.982-276.230)      | 0.012          |
| Gross total resection | 0.036(0.004-0.344)         | 0.004          |
